# Supplementary material for: Influence of companion diagnostics on efficacy and safety of targeted anti-cancer drugs: systematic review and meta-analyses
Source: PubMed Central journal article supplement (PMC4741844; doi:10.18632/oncotarget.5946), 2015-10-04
Supplement: oncotarget-06-39538-s001.pdf [file oncotarget-06-39538-s001.pdf]

# Influence of companion diagnostics on efficacy and safety of targeted anti-cancer drugs: systematic review and meta-analyses

## Supplementary Material

| Section/topic                      | #  | Checklist item                                                                                                                                                                                                                                                                                              | Reported on page # |
|------------------------------------|----|-------------------------------------------------------------------------------------------------------------------------------------------------------------------------------------------------------------------------------------------------------------------------------------------------------------|--------------------|
| <b>TITLE</b>                       |    |                                                                                                                                                                                                                                                                                                             |                    |
| Title                              | 1  | Identify the report as a systematic review, meta-analysis, or both.                                                                                                                                                                                                                                         | 1                  |
| <b>ABSTRACT</b>                    |    |                                                                                                                                                                                                                                                                                                             |                    |
| Structured summary                 | 2  | Provide a structured summary including, as applicable: background; objectives; data sources; study eligibility criteria, participants, and interventions; study appraisal and synthesis methods; results; limitations; conclusions and implications of key findings; systematic review registration number. | 1                  |
| <b>INTRODUCTION</b>                |    |                                                                                                                                                                                                                                                                                                             |                    |
| Rationale                          | 3  | Describe the rationale for the review in the context of what is already known.                                                                                                                                                                                                                              | 2                  |
| Objectives                         | 4  | Provide an explicit statement of questions being addressed with reference to participants, interventions, comparisons, outcomes, and study design (PICOS).                                                                                                                                                  |                    |
| <b>METHODS</b>                     |    |                                                                                                                                                                                                                                                                                                             |                    |
|                                    |    |                                                                                                                                                                                                                                                                                                             | 7-8                |
| Protocol and registration          | 5  | Indicate if a review protocol exists, if and where it can be accessed (e.g., Web address), and, if available, provide registration information including registration number.                                                                                                                               |                    |
| Eligibility criteria               | 6  | Specify study characteristics (e.g., PICOS, length of follow-up) and report characteristics (e.g., years considered, language, publication status) used as criteria for eligibility, giving rationale.                                                                                                      |                    |
| Information sources                | 7  | Describe all information sources (e.g., databases with dates of coverage, contact with study authors to identify additional studies) in the search and date last searched.                                                                                                                                  |                    |
| Search                             | 8  | Present full electronic search strategy for at least one database, including any limits used, such that it could be repeated.                                                                                                                                                                               |                    |
| Study selection                    | 9  | State the process for selecting studies (i.e., screening, eligibility, included in systematic review, and, if applicable, included in the meta-analysis).                                                                                                                                                   |                    |
| Data collection process            | 10 | Describe method of data extraction from reports (e.g., piloted forms, independently, in duplicate) and any processes for obtaining and confirming data from investigators.                                                                                                                                  |                    |
| Data items                         | 11 | List and define all variables for which data were sought (e.g., PICOS, funding sources) and any assumptions and simplifications made.                                                                                                                                                                       |                    |
| Risk of bias in individual studies | 12 | Describe methods used for assessing risk of bias of individual studies (including specification of whether this was done at the study or outcome level), and how this information is to be used in any data synthesis.                                                                                      |                    |
| Summary measures                   | 13 | State the principal summary measures (e.g., risk ratio, difference in means).                                                                                                                                                                                                                               |                    |
| Synthesis of results               | 14 | Describe the methods of handling data and combining results of studies, if done, including measures of consistency (e.g., $I^2$ ) for each meta-analysis.                                                                                                                                                   |                    |

| Section/topic                 | #  | Checklist item                                                                                                                                                                                           | Reported on page # |
|-------------------------------|----|----------------------------------------------------------------------------------------------------------------------------------------------------------------------------------------------------------|--------------------|
| Risk of bias across studies   | 15 | Specify any assessment of risk of bias that may affect the cumulative evidence (e.g., publication bias, selective reporting within studies).                                                             | 2                  |
| Additional analyses           | 16 | Describe methods of additional analyses (e.g., sensitivity or subgroup analyses, meta-regression), if done, indicating which were pre-specified.                                                         |                    |
| <b>RESULTS</b>                |    |                                                                                                                                                                                                          |                    |
| Study selection               | 17 | Give numbers of studies screened, assessed for eligibility, and included in the review, with reasons for exclusions at each stage, ideally with a flow diagram.                                          | 6-7                |
| Study characteristics         | 18 | For each study, present characteristics for which data were extracted (e.g., study size, PICOS, follow-up period) and provide the citations.                                                             |                    |
| Risk of bias within studies   | 19 | Present data on risk of bias of each study and, if available, any outcome level assessment (see item 12).                                                                                                |                    |
| Results of individual studies | 20 | For all outcomes considered (benefits or harms), present, for each study: (a) simple summary data for each intervention group (b) effect estimates and confidence intervals, ideally with a forest plot. |                    |
| Synthesis of results          | 21 | Present results of each meta-analysis done, including confidence intervals and measures of consistency.                                                                                                  |                    |
| Risk of bias across studies   | 22 | Present results of any assessment of risk of bias across studies (see Item 15).                                                                                                                          |                    |
| Additional analysis           | 23 | Give results of additional analyses, if done (e.g., sensitivity or subgroup analyses, meta-regression [see Item 16]).                                                                                    |                    |
| <b>DISCUSSION</b>             |    |                                                                                                                                                                                                          |                    |
| Summary of evidence           | 24 | Summarize the main findings including the strength of evidence for each main outcome; consider their relevance to key groups (e.g., healthcare providers, users, and policy makers).                     | 8                  |
| Limitations                   | 25 | Discuss limitations at study and outcome level (e.g., risk of bias), and at review-level (e.g., incomplete retrieval of identified research, reporting bias).                                            |                    |
| Conclusions                   | 26 | Provide a general interpretation of the results in the context of other evidence, and implications for future research.                                                                                  |                    |
| <b>FUNDING</b>                |    |                                                                                                                                                                                                          |                    |
| Funding                       | 27 | Describe sources of funding for the systematic review and other support (e.g., supply of data); role of funders for the systematic review.                                                               |                    |

Supplementary Table 1. FDA approved drugs by indication in adult solid tumor.

| Tumor Type                           | Study Drugs                                                                                                                                                                                                                                                                                                                                         |
|--------------------------------------|-----------------------------------------------------------------------------------------------------------------------------------------------------------------------------------------------------------------------------------------------------------------------------------------------------------------------------------------------------|
| Breast Cancer                        | <p><b>Targeted agents non companion diagnostics</b></p> <ul style="list-style-type: none"> <li>•Bevacizumab, Everolimus</li> </ul> <p><b>Targeted agents companion diagnostics</b></p> <ul style="list-style-type: none"> <li>•Lapatinib, Pertuzumab, Trastuzumab, Trastuzumab emtansine</li> </ul>                                                 |
| Colorectal Cancer                    | <p><b>Targeted agents non companion diagnostics</b></p> <ul style="list-style-type: none"> <li>•Aflibercept</li> <li>•Bevacizumab</li> <li>•Cetuximab</li> <li>•Panitumumab</li> <li>•Regorafenib</li> </ul> <p><b>Targeted agents companion diagnostics</b></p> <ul style="list-style-type: none"> <li>•Cetuximab</li> <li>•Panitumumab</li> </ul> |
| Gastric or Gastro-oesophageal Cancer | <p><b>Targeted agents non companion diagnostics</b></p> <ul style="list-style-type: none"> <li>•Ramucirumab</li> </ul> <p><b>Targeted agents companion diagnostics</b></p> <ul style="list-style-type: none"> <li>•Trastuzumab</li> </ul>                                                                                                           |

|                                |                                                                                                                                                                                                                                                                                       |
|--------------------------------|---------------------------------------------------------------------------------------------------------------------------------------------------------------------------------------------------------------------------------------------------------------------------------------|
| Gastrointestinal Stromal Tumor | <b>Target agents against a tumor with a ubiquitous molecular alteration</b> <ul style="list-style-type: none"> <li>•Regorafenib</li> <li>•Sunitinib</li> </ul>                                                                                                                        |
| Hepatocellular Carcinoma       | <b>Targeted agents non companion diagnostics</b> <ul style="list-style-type: none"> <li>•Sorafenib</li> </ul>                                                                                                                                                                         |
| Head and Neck Cancer           | <b>Targeted agents non companion diagnostics</b> <ul style="list-style-type: none"> <li>•Cetuximab</li> </ul>                                                                                                                                                                         |
| Lung Cancer                    | <b>Targeted agents non companion diagnostics</b> <ul style="list-style-type: none"> <li>•Bevacizumab</li> <li>•Erlotinib</li> </ul> <b>Targeted agents companion diagnostics</b> <ul style="list-style-type: none"> <li>•Afatinib</li> <li>•Crizotinib</li> <li>•Gefitinib</li> </ul> |
| Medullary Thyroid Cancer       | <b>Target agents against a tumor with a ubiquitous molecular alteration</b> <ul style="list-style-type: none"> <li>•Cabozantinib</li> <li>•Vendetanib</li> </ul>                                                                                                                      |
| Melanoma                       | <b>Targeted agents companion diagnostics</b> <ul style="list-style-type: none"> <li>•Dabrafenib</li> <li>•Trametinib</li> <li>•Vemurafenib</li> </ul>                                                                                                                                 |

|                      |                                                                                                                                                                                                                                    |
|----------------------|------------------------------------------------------------------------------------------------------------------------------------------------------------------------------------------------------------------------------------|
| Pancreatic Cancer    | <b>Targeted agents non companion diagnostics</b> <ul style="list-style-type: none"><li>•Erlotinib</li><li>•Everolimus</li><li>•Sunitinib</li></ul>                                                                                 |
| Renal Cell Carcinoma | <b>Targeted agents non companion diagnostics</b> <ul style="list-style-type: none"><li>•Axitinib</li><li>•Bevacizumab</li><li>•Everolimus</li><li>•Pazopanib</li><li>•Sorafenib</li><li>•Sunitinib</li><li>•Temsirolimus</li></ul> |
| Soft-tissue Sarcoma  | <b>Targeted agents non companion diagnostics</b> <ul style="list-style-type: none"><li>•Pazopanib</li></ul>                                                                                                                        |

**Supplementary table 2.FDA-approved companion diagnostic devices for oncology**

| Generic Name (Drug Trade Name)     | NDA/BLA                  | Device Trade Name                                                     | PMA                   | Device Manufacturer           |
|------------------------------------|--------------------------|-----------------------------------------------------------------------|-----------------------|-------------------------------|
| Cetuximab (Erbix)                  | BLA 125084               | TherascreenKRAS RGQ PCR Kit                                           | P110030               | Qiagen Manchester, Ltd.       |
| Cetuximab (Erbix)                  | BLA 125084               | Dako EGFR PharmDx Kit                                                 | P030044 S001–<br>S002 | Dako North America, Inc.      |
| Panitumumab (Vectibix)             | BLA 125147               |                                                                       |                       |                               |
| Afatinib (Gilotrif)                | NDA 201292               | Therascreen EGFR RGQ PCR Kit                                          | P120022               | Qiagen Manchester, Ltd.       |
| Imatinib mesylate (Gleevec/Glivec) | NDA 021335<br>NDA 021588 | DAKO C-KIT PharmDx                                                    | P040011 S001–<br>S002 | Dako North America, Inc.      |
| Trastuzumab (Herceptin)            | BLA 103792               | INFORM HER2 NEU                                                       | P940004 S001          | Ventana Medical Systems, Inc. |
| Trastuzumab (Herceptin)            | BLA 103792               | PATHVYSION HER2 DNA Probe Kit                                         | P980024 S001–<br>S010 | Abbott Molecular, Inc.        |
| Trastuzumab (Herceptin)            | BLA 103792               | PATHWAY ANTI-HER2 NEU (4B5)<br><br>Rabbit monoclonal primary antibody | P990081 S001–<br>S016 | Ventana Medical Systems, Inc. |
| Trastuzumab (Herceptin)            | BLA 103792               | INSITE HER2 NEU KIT                                                   | P040030               | Biogenex Laboratories, Inc.   |
| Trastuzumab (Herceptin)            | BLA 103792               | SPOT-LIGHT HER2 CISH Kit                                              | P050040 S001–<br>S003 | Life Technologies, Inc.       |
| Trastuzumab (Herceptin)            | BLA 103792               | Bond Oracle Her2 IHC System                                           | P090015               | Leica Biosystems              |
| Trastuzumab (Herceptin)            | BLA 103792               | HER2 CISH PharmDx Kit                                                 | P100024 S001–         | Dako Denmark A/S              |

|                                        |                    |                                                      |                           |                                      |
|----------------------------------------|--------------------|------------------------------------------------------|---------------------------|--------------------------------------|
|                                        |                    |                                                      | S004                      |                                      |
| Trastuzumab (Herceptin)                | BLA 103792         | INFORM HER2 DUAL ISH DNA<br><br>Probe Cocktail Assay | P100027 S001–<br><br>S006 | Ventana Medical Systems,<br><br>Inc. |
| Trastuzumab (Herceptin)                | BLA 103792         | HercepTest                                           | P980018 S001–<br><br>S017 | Dako Denmark A/S                     |
| Pertuzumab (Perjeta)                   | BLA 125409         |                                                      |                           |                                      |
| Ado-trastuzumab emtansine<br>(Kadcyla) |                    |                                                      |                           |                                      |
| Trastuzumab (Herceptin)                | BLA 103792         | HER2 FISH PharmDx Kit                                | P040005 S001–<br><br>S009 | Dako Denmark A/S                     |
| Pertuzumab (Perjeta)                   | BLA 125409         |                                                      |                           |                                      |
| Ado-trastuzumab emtansine<br>(Kadcyla) |                    |                                                      |                           |                                      |
| Tramatenib (Mekinist)                  | NDA<br><br>204114; | THxID BRAF Kit                                       | P120014                   | bioMerieux, Inc.                     |
| Dabrafenib (Tafinlar)                  | NDA<br><br>202806  |                                                      |                           |                                      |
| Erlotinib (Tarceva)                    | NDA 021743         | Cobas EGFR Mutation Test                             | P120019                   | Roche Molecular Systems,<br><br>Inc. |
| Crizotinib (Xalkori)                   | NDA 202570         | VYSIS ALK Break Apart FISH<br><br>Probe Kit          | P110012 S001–<br><br>S003 | Abbott Molecular, Inc.               |
| Vemurafenib (Zelboraf)                 | NDA 202429         | COBAS 4800 BRAF V600<br><br>Mutation Test            | P110020 S001–<br><br>S006 | Roche Molecular Systems,<br><br>Inc. |
